# Supplementary material
Source: MDPI journal article supplement (https://www.mdpi.com/1999-4907/14/11/2122)
Supplement: s1 [file s1]

**Table S1.** Information on the 152 maximum latewood density (MXD) chronologies selected for the study. Positive longitude values are east of the prime meridian and negative values are west of the prime meridian. The period is the common interval of the meteorological data and MXD chronologies for analysis.

| Location | Filename | Site name                     | Latitu<br>de<br>(°) | Longitu<br>de<br>(°) | Altitu<br>de<br>(m) | Species                                  | Period        |
|----------|----------|-------------------------------|---------------------|----------------------|---------------------|------------------------------------------|---------------|
| America  | ak006    | Denali National-Park          | 63.4                | -149.35              | 750                 | Picea glauca<br>(Moench) Voss            | 1903-19<br>83 |
| America  | ak007    | Glenn Highway                 | 61.2                | -149.35              | 100                 | Picea glauca<br>(Moench) Voss            | 1903-19<br>83 |
| America  | ak009    | Slana bei Tok                 | 62.5                | -143.55              | 600                 | Picea glauca<br>(Moench) Voss            | 1910-19<br>83 |
| America  | ak011    | Mt.Billy Mitchell             | 61.2                | -145.15              | 300                 | Picea glauca<br>(Moench) Voss            | 1910-19<br>83 |
| America  | ak072    | Windy Wolf                    | 61.46               | -141.38              | 1036                | Picea glauca<br>(Moench) Voss            | 1913-19<br>97 |
| America  | ak075    | Hawkins Hill                  | 61.09               | -142.05              | 1030                | Picea glauca<br>(Moench) Voss            | 1911-19<br>97 |
| America  | ak115    | Seward Composite              | 65.1                | -162.15              |                     | Picea glauca<br>(Moench) Voss            | 1908-20<br>01 |
| America  | ak117    | Northern Alaska<br>Composit   | 67                  | -152                 |                     | Picea glauca<br>(Moench) Voss            | 1903-19<br>90 |
| America  | ak132    | Firth River                   | 68.39               | -141.38              | 790                 | Picea glauca<br>(Moench) Voss            | 1901-20<br>02 |
| America  | co553    | Pike Peaks                    | 39.33               | -105.03              | 3600                | Picea engelmannii<br>Parry ex Engelm.    | 1901-19<br>83 |
| America  | co574    | Niwot Ridge C                 | 40.05               | -105.55              | 3400                | Picea engelmannii<br>Parry ex Engelm.    | 1901-19<br>82 |
| America  | id007    | Cascade Radar St.<br>Payette  | 44.43               | -116.08              | 2140                | Picea engelmannii<br>Parry ex Engelm.    | 1901-19<br>83 |
| America  | me010    | Elephant Mountain             | 44.77               | -70.77               | 930                 | Picea rubens Sarg.                       | 1901-19<br>76 |
| America  | me015    | Traveler Mountain             | 46.07               | -68.85               | 952                 | Picea rubens Sarg.                       | 1901-19<br>76 |
| America  | nm569    | Ski Valley Wheeler<br>Peak    | 36.58               | -105.5               | 3120                | Picea engelmannii<br>Parry ex Engelm.    | 1901-19<br>83 |
| America  | or042    | Crater Lake                   | 42.97               | -122.17              | 2200                | Tsuga<br>mertensiana<br>(Bong.) Carriere | 1901-19<br>83 |
| America  | ut511    | Ceadar Breaks                 | 37.58               | -113.85              | 3120                | Picea engelmannii<br>Parry ex Engelm.    | 1901-19<br>83 |
| America  | wy024    | Granite Pass Hunt<br>Mountain | 44.78               | -107.87              | 2820                | Picea engelmannii<br>Parry ex Engelm.    | 1901-19<br>83 |
| Austria  | aust005  | Katscherpass                  | 47.03               | 13.63                | 1800                | Picea abies (L.) H.<br>Karst.            | 1901-19<br>75 |

|                              |         |                             |       |         |      |                                     |               |
|------------------------------|---------|-----------------------------|-------|---------|------|-------------------------------------|---------------|
| Austria                      | aust006 | Mariazell<br>Gemeindealpe   | 47.78 | 15.3    | 1380 | Picea abies (L.) H.<br>Karst.       | 1901-19<br>75 |
| Bosnia<br>and<br>Herzegovina | yugo004 | Jahorina                    | 43.75 | 18.63   | 1700 | Picea abies (L.) H.<br>Karst.       | 1901-19<br>81 |
| Bosnia<br>and<br>Herzegovina | yugo005 | Cakor Pass                  | 42.63 | 19.93   | 1750 | Picea omorika<br>(Pancic) Purk.     | 1901-19<br>81 |
| Britain                      | brit017 | Ballochbuie                 | 56.95 | -3.32   | 381  | Pinus sylvestris L.                 | 1901-19<br>78 |
| Britain                      | brit019 | Franchise Wood              | 50.95 | -1.68   | 100  | Pinus sylvestris L.                 | 1901-19<br>76 |
| Britain                      | brit024 | Glen Affric                 | 57.28 | -4.92   | 300  | Pinus sylvestris L.                 | 1901-19<br>78 |
| Britain                      | brit026 | Coulin                      | 57.53 | -5.35   | 250  | Pinus sylvestris L.                 | 1901-19<br>78 |
| Bulgaria                     | bulg001 | Vihren National Park        | 41.77 | 23.38   | 1920 | Pinus leucodermis<br>Ant.           | 1901-19<br>81 |
| Bulgaria                     | bulg002 | Sipenski prohod,<br>Kazanla | 42.73 | 25.33   | 1300 | Picea abies (L.) H.<br>Karst.       | 1922-19<br>81 |
| Bulgaria                     | bulg003 | Vihren Peak                 | 41.42 | 23.3    | 2150 | Pinus heldreichii<br>Christ         | 1901-20<br>08 |
| Canada                       | cana038 | Bruno Lake                  | 51.37 | -95.5   | 1000 | Picea glauca<br>(Moench) Voss       | 1901-19<br>88 |
| Canada                       | cana041 | High Stone Lake             | 50.24 | -91.27  | 1300 | Picea glauca<br>(Moench) Voss       | 1901-19<br>88 |
| Canada                       | cana042 | Armstrong                   | 50.18 | -89.03  | 1120 | Picea glauca<br>(Moench) Voss       | 1915-19<br>88 |
| Canada                       | cana043 | Armstrong (eben)            | 50.18 | -89.03  | 1120 | Picea glauca<br>(Moench) Voss       | 1915-19<br>88 |
| Canada                       | cana045 | Willow Lake                 | 62.1  | -119.08 | 620  | Picea<br>mariana(Mill.)<br>Britton, | 1901-19<br>88 |
| Canada                       | cana053 | Pethai-Peninsula            | 62.41 | -110.58 | 1400 | Picea glauca<br>(Moench) Voss       | 1913-19<br>88 |
| Canada                       | cana058 | Austin Lake                 | 62.1  | -110.05 | 850  | Picea glauca<br>(Moench) Voss       | 1913-19<br>88 |
| Canada                       | cana060 | Churchill                   | 58.4  | -93.5   | 50   | Picea glauca<br>(Moench) Voss       | 1932-19<br>88 |
| Canada                       | cana065 | Eastmain River              | 52.02 | -77.51  | 450  | Picea<br>mariana(Mill.)<br>Britt    | 1903-19<br>88 |
| Canada                       | cana068 | Fishing Creek               | 52.01 | -82.84  | 200  | Picea<br>mariana(Mill.)<br>Britt    | 1905-19<br>88 |
| Canada                       | cana069 | Churchill                   | 58.4  | -93.29  | 50   | Larix laricina (Du<br>Roi) K. Koch  | 1901-19<br>88 |

|        |         |                                   |       |         |      |                                           |               |
|--------|---------|-----------------------------------|-------|---------|------|-------------------------------------------|---------------|
| Canada | cana070 | Charlie Lake                      | 60.02 | -100.26 | 1055 | Picea<br>mariana(Mill.)<br>Britt          | 1901-19<br>88 |
| Canada | cana075 | Lac Chevrillon                    | 50.01 | -74.27  | 1200 | Picea<br>mariana(Mill.)<br>Britt          | 1914-19<br>88 |
| Canada | cana076 | Eastmain River                    | 52.02 | -77.51  | 450  | Picea<br>mariana(Mill.)<br>Britt          | 1904-19<br>88 |
| Canada | cana077 | Coats River                       | 55.44 | -76.09  | 1000 | Picea<br>mariana(Mill.)<br>Britton,       | 1942-19<br>88 |
| Canada | cana079 | Webequie                          | 53.04 | -87.2   | 645  | Picea glauca<br>(Moench) Voss             | 1942-19<br>88 |
| Canada | cana098 | Vermilion Pass                    | 51.1  | -116.1  | 1500 | Picea engelmannii<br>Parry ex Engelm.     | 1901-19<br>83 |
| Canada | cana113 | Arrowsmith<br>Mountain            | 49.09 | -125.14 | 1020 | Psuga<br>mettensiana(Bong<br>) Carriere   | 1901-19<br>84 |
| Canada | cana171 | Athabasca Glacier                 | 52.25 | -117.25 | 2000 | Picea engelmannii<br>Parry ex Engelm.     | 1901-19<br>94 |
| Canada | cana321 | Eagle<br>Fecal/Ptarmigan<br>Merge | 69.3  | -127.5  |      | Picea glauca<br>(Moench) Voss             | 1949-19<br>93 |
| Canada | cana421 | Sunshine Meadows                  | 51.04 | -115.47 | 2250 | Larix lyallii Parl.                       | 1901-19<br>87 |
| China  | byg     | Baiyanggou                        | 43.6  | 86.4    | 2617 | Picea<br>schrenkiana Fisch.<br>& C.A.Mey. | 1956-20<br>09 |
| China  | dl      | Dalujiao                          | 43.9  | 85.1    | 2600 | Picea<br>schrenkiana Fisch.<br>& C.A.Mey. | 1956-20<br>12 |
| China  | gns     | Gongnais                          | 43.2  | 84.6    | 2601 | Picea<br>schrenkiana Fisch.<br>& C.A.Mey. | 1956-20<br>08 |
| China  | kg      | Kuangou                           | 43.6  | 89.6    | 2530 | Picea<br>schrenkiana Fisch.<br>& C.A.Mey. | 1956-20<br>15 |
| China  | ql      | Qiaolaketiereke                   | 42.8  | 81.7    | 2760 | Picea<br>schrenkiana Fisch.<br>& C.A.Mey. | 1956-20<br>14 |
| China  | st      | Shitougou                         | 43.8  | 85.6    | 2606 | Picea<br>schrenkiana Fisch.<br>& C.A.Mey. | 1956-20<br>12 |
| Cyprus | cypr001 | Troodos                           | 34.93 | 32.87   |      | Pinus nigra J.F.<br>Arnold                | 1901-19<br>80 |
| Cyprus | cypr002 | Troodos (Mittel)                  | 34.93 | 32.87   | 1820 | Pinus nigra J.F.<br>Arnold                | 1901-19<br>81 |
| Cyprus | cypr004 | Plano Platres                     | 34.9  | 32.9    | 1600 | Pinus nigra J.F.                          | 1901-19       |

|                |         |                                                     |       |       |      |                            |            |
|----------------|---------|-----------------------------------------------------|-------|-------|------|----------------------------|------------|
|                |         | (Feucht)                                            |       |       |      | Arnold                     | 81         |
| Cyprus         | cypr006 | Ceader Valley (Feucht)                              | 34.98 | 32.68 | 1200 | Cedrus libani A. Rich.     | 1901-19 81 |
| Cyprus         | cypr008 | Ceader Valley (Mittel-T)                            | 34.98 | 32.68 | 1380 | Cedrus libani A. Rich.     | 1901-19 81 |
| Cyprus         | cypr009 | Ceader Valley (Trocken)                             | 34.98 | 32.68 | 1280 | Cedrus libani A. Rich.     | 1901-19 81 |
| Cyprus         | cypr012 | Ceadar Valley (mittel-f)                            | 34.98 | 32.68 | 1370 | Cedrus libani A. Rich.     | 1901-19 82 |
| Czech Republic | czec001 | Krkonoše Mountains Upper Labe Valley Northern Slope | 50.75 | 15.55 | 1000 | Picea abies (L.) H. Karst. | 1901-19 91 |
| Czech Republic | czec002 | Krkonoše Mountains Upper Labe Valley Southern Slope | 50.75 | 15.55 | 1150 | Picea abies (L.) H. Karst. | 1901-19 89 |
| Finland        | finl014 | Haaparava National Park                             | 62.58 | 31.17 | 145  | Pinus sylvestris L.        | 1901-19 78 |
| Finland        | finl015 | Koliberg                                            | 63.1  | 25.48 | 300  | Picea abies (L.) H. Karst. | 1901-19 78 |
| France         | fran015 | Col D'Allos                                         | 44.27 | 6.57  | 1900 | Abies alba Mill.           | 1901-19 75 |
| France         | fran022 | Llipodere                                           | 42.45 | 2.38  | 1950 | Pinus mughus Scop.         | 1901-19 77 |
| France         | fran026 | Arette Col St. Marti                                | 42.98 | -0.75 | 1500 | Abies alba Mill.           | 1901-19 77 |
| France         | fran027 | Col de Sorba Mount Renoso                           | 42.07 | 9.2   | 1400 | Pinus nigra J.F. Arnold    | 1901-19 80 |
| France         | fran032 | Aubure                                              | 48.57 | 8     | 1080 | Picea abies (L.) H. Karst. | 1904-19 94 |
| France         | fran034 | Lac de Bourget                                      | 45.53 | 5.44  | 1340 | Picea abies (L.) H. Karst. | 1901-19 75 |
| Germany        | germ020 | Andreasberg Harz Schluff                            | 51.72 | 10.57 | 900  | Picea abies (L.) H. Karst. | 1901-19 78 |
| Germany        | germ045 | Sulzbach-Tal                                        | 47.83 | 7.7   | 390  | Abies alba Mill.           | 1901-19 95 |
| Germany        | germ054 | Munstertal                                          | 47.85 | 7.78  | 490  | Abies alba Mill.           | 1901-19 95 |
| Greece         | gree001 | Katara Pass Metsovan                                | 39.8  | 21.22 | 1750 | Pinus leucodermis Ant.     | 1901-19 81 |
| Greece         | gree004 | Menalon Oros                                        | 37.63 | 22.28 | 1620 | Abies cephalonica Loudon   | 1901-19 81 |
| Italy          | ital006 | Cortina d'Ampezzo                                   | 46.53 | 12.07 | 1820 | Picea abies (L.) H. Karst. | 1901-19 75 |
| Italy          | ital009 | Abetone                                             | 44.12 | 10.7  | 1400 | Abies alba Mill.           | 1901-19 80 |
| Italy          | ital012 | Ceppo Bosque di Martense                            | 42.68 | 13.43 | 1700 | Abies alba Mill.           | 1901-19 80 |
| Italy          | ital013 | Aetna Linguaglossa                                  | 37.78 | 15.05 | 1800 | Pinus nigra J.F. Arnol     | 1901-19 80 |

|                 |             |                         |       |        |      |                                       |           |
|-----------------|-------------|-------------------------|-------|--------|------|---------------------------------------|-----------|
| Italy           | ital014     | Blumone Malga           | 45.88 | 10.42  | 1650 | Picea abies (L.) H. Karst.            | 1901-1980 |
| Japan           | japa013     | Moshiri                 | 44.21 | 142.11 | 320  | Picea glehnii(Fr.Schmidt) Mast.       | 1901-1999 |
| Japan           | japa008     | Mount Asasahi           | 43.77 | 142.55 | 1350 | Picea glehnii(Fr.Schmidt) Mast.       | 1901-1997 |
| Japan           | japa015     | Onnebetsu               | 43.13 | 145.28 | 69   | Picea glehnii(Fr.Schmidt) Mast.       | 1901-1998 |
| Nepal           | nepa001     | Ghorepanipass Annapurne | 28.42 | 83.75  | 3220 | Abies spectabilis (D. Don) Spach      | 1901-1978 |
| Nepal           | nepa002     | Kalingchok Gebirge      | 27.75 | 86.08  | 3720 | Abies spectabilis (D. Don) Spach      | 1901-1978 |
| Norse           | norw006     | Veolia                  | 61.42 | 8.98   | 880  | Pinus sylvestris L.                   | 1901-1978 |
| North Macedonia | yugo006     | Pelister National Park  | 41.02 | 21.18  | 1900 | Pinus peuce Griseb                    | 1901-1981 |
| Pakistan        | Chandanwani | Chandanwani             | 34.25 | 75.92  | 3200 | Abies pindrow (Royle ex D. Don) Royle | 1901-1981 |
| Pakistan        | Gulmarg     | Gulmarg                 | 35.08 | 74.3   | 2740 | Abies pindrow (Royle ex D. Don) Royle | 1901-1980 |
| Pakistan        | Khillanmarg | Khillanmarg             | 35.08 | 74.33  | 3125 | Abies pindrow (Royle ex D. Don) Royle | 1901-1981 |
| Pakistan        | Sarbal      | Sarbal                  | 34.5  | 75.75  | 3110 | Abies pindrow (Royle ex D. Don) Royle | 1901-1981 |
| Pakistan        | Sonmarg     | Sonmarg                 | 34.58 | 75.55  | 3125 | Abies pindrow (Royle ex D. Don) Royle | 1901-1980 |
| Pakistan        | Thijwas A   | Thijwas A               | 34.65 | 75.47  | 3200 | Abies pindrow (Royle ex D. Don) Royle | 1901-1981 |
| Pakistan        | Thijwas B   | Thijwas B               | 34.58 | 75.53  | 3400 | Abies pindrow (Royle ex D. Don) Royle | 1901-1981 |
| Poland          | pola027x    | DolinaSuchejwody        | 49.15 | 20.02  | 1480 | Picea abies (L.) H. Karst.            | 1901-2004 |
| Romania         | roma003     | Roncan Gium Vau         | 47.45 | 25.47  | 1480 | Picea abies (L.) H. Karst.            | 1901-1981 |
| Romania         | roma004     | Capra, Mt.Agarasului    | 45.55 | 24.67  | 1600 | Picea abies (L.) H. Karst.            | 1901-1981 |
| Russia          | russ020     | Baikalsee, Irkutsk      | 53.6  | 105    | 700  | Pinus sylvestris L.                   | 1901-1978 |
| Russia          | russ027     | Indikyakha-River        | 68.25 | 80.18  | 60   | Larix sibirica Ledeb.                 | 1932-19   |

|        |         |                          |       |        |      |                                  |               |
|--------|---------|--------------------------|-------|--------|------|----------------------------------|---------------|
|        |         |                          |       |        |      |                                  | 90            |
| Russia | russ028 | Kulumbe River            | 67.58 | 88.55  | 160  | Larix sibirica<br>Ledeb.         | 1901-19<br>90 |
| Russia | russ029 | Ikon River               | 70.31 | 89.3   | 50   | Larix<br>gmelinii(Rupr.)Kuzen.   | 1931-19<br>90 |
| Russia | russ047 | Kedvaran                 | 64.15 | 53.34  | 70   | Picea obobata<br>ledeb.          | 1901-19<br>90 |
| Russia | russ050 | Zhigansk                 | 66.31 | 122.2  | 180  | Pinus sylvestris L.              | 1901-19<br>91 |
| Russia | russ055 | Khotugn-Uladan-Tukulan   | 63.23 | 125.48 | 100  | Pinus sylvestris L.              | 1901-19<br>91 |
| Russia | russ061 | Kedvaran                 | 64.25 | 53.57  | 70   | Larix sibirica<br>Ledeb.         | 1901-19<br>91 |
| Russia | russ062 | Kedvaran                 | 64.25 | 53.57  | 70   | Pinus sylvestris L.              | 1901-19<br>90 |
| Russia | russ063 | Ayandina River           | 68.42 | 143.17 | 45   | Larix gmelinii<br>(Rupr.) Kuzen. | 1901-19<br>91 |
| Russia | russ077 | Ary-Ongorbynf-River      | 71.7  | 118.58 | 140  | Larix gmelinii<br>(Rupr.) Kuzen. | 1926-19<br>90 |
| Russia | russ087 | Alagea River             | 68.45 | 147.58 | 140  | Larix gmelinii<br>(Rupr.) Kuzen. | 1928-19<br>91 |
| Russia | russ088 | Balshoia Anui            | 66.22 | 165.42 | 500  | Larix gmelinii<br>(Rupr.) Kuzen. | 1928-19<br>91 |
| Russia | russ094 | Ayakli River             | 69.53 | 97.53  | 550  | Larix gmelinii<br>(Rupr.) Kuzen. | 1933-19<br>90 |
| Russia | russ099 | Denezkin Kamen Mountain  | 60.57 | 59.55  | 720  | Pinus sylvestris L.              | 1901-19<br>92 |
| Russia | russ106 | Batagay,Chandon-river    | 70.25 | 138.17 | 80   | Larix gmelinii<br>(Rupr.) Kuzen. | 1929-19<br>91 |
| Russia | russ108 | Baraii River             | 63.65 | 133.78 | 200  | Larix gmelinii<br>(Rupr.) Kuzen. | 1901-19<br>91 |
| Russia | russ118 | Iremel Mountain          | 54.88 | 58.88  | 990  | Pinus sylvestris L.              | 1901-19<br>93 |
| Russia | russ125 | Alakurtti                | 66.98 | 30.25  | 200  | Pinus sylvestris L.              | 1901-19<br>92 |
| Russia | russ129 | Ceminsky pass<br>(Altai) | 51    | 85.63  | 1450 | Larix sibirica<br>Ledeb.         | 1901-19<br>94 |
| Russia | russ132 | Andryuschkine            | 69.28 | 154.77 | 50   | Larix gmelinii<br>(Rupr.) Kuzen. | 1927-19<br>91 |
| Russia | russ135 | Aktasch Valley           | 50.42 | 87.58  | 2000 | Larix gmelinii<br>(Rupr.) Kuzen. | 1901-19<br>94 |
| Russia | russ145 | Adycha river             | 65.8  | 137.25 | 800  | Larix gmelinii<br>(Rupr.) Kuzen. | 1901-19<br>91 |
| Russia | russ146 | Adycha river             | 65.8  | 137.25 | 800  | Larix gmelinii                   | 1927-19       |

|                      |         |                             |       |        |      |                                                        |                     |
|----------------------|---------|-----------------------------|-------|--------|------|--------------------------------------------------------|---------------------|
|                      |         |                             |       |        |      | (Rupr.) Kuzen.                                         | 91                  |
| Russia               | russ147 | Balygichan Ebene            | 62.13 | 155.03 | 700  | Larix gmelinii<br>(Rupr.) Kuzen.                       | 1901-19<br>94       |
| Russia               | russ150 | Sarekungey                  | 41.4  | 76.26  | 2800 | Picea schrenkiana<br>Fisch. & C.A. Mey.                | 1901-19<br>95       |
| Russia               | russ151 | Sarekungey,j                | 41.4  | 76.26  | 2800 | Picea schrenkiana<br>Fisch. & C.A. Mey.                | 1901-19<br>95       |
| Russia               | russ152 | Sarejmek                    | 41.6  | 75.15  | 2800 | Picea schrenkiana<br>Fisch. & C.A. Mey.                | 1901-19<br>95       |
| Russia               | russ155 | Under vangapur<br>river     | 62.56 | 76.23  | 180  | Pinus sylvestris<br>L.                                 | 1901-19<br>94       |
| Russia               | russ173 | Tschita                     | 56.5  | 118.5  | 700  | Pinus sylvestris<br>L.                                 | 1940-19<br>96       |
| Russia               | russ174 | White-River                 | 61.51 | 93.24  | 120  | Picea obovata<br>Ledeb.                                | 1926-19<br>94       |
| Russia               | russ175 | Nirukda                     | 61.56 | 95.09  | 160  | Picea obovata<br>Ledeb.                                | 1932-19<br>94       |
| Russia               | russ224 | Polar Urals                 | 66.49 | 65.35  | 190  | Larix sibirica<br>Ledeb.                               | 1901-20<br>01       |
| Russia               | russ225 | Polar Urals                 | 66.49 | 65.35  | 190  |                                                        | 1901-20             |
| Slovakia             | svk001  | Dolina<br>Mengusowska       | 49.09 | 20.04  | 1450 | Pinus sylvestris L.<br>Larix decidua<br>Mill.          | 06<br>1901-20<br>04 |
| Slovenia<br>(Poland) | pola020 | Gasienicowy                 | 49.25 | 19.92  | 1500 | Picea abies (L.) H.<br>Karst.                          | 1901-19<br>64       |
| Spain                | spai005 | Alcala de Selva             | 40.38 | -0.67  | 1960 | Pinus mughus<br>Scop.                                  | 1901-19<br>78       |
| Spain                | spai058 | Calvero, S.d.Gredos         | 40.27 | -5.6   | 1400 |                                                        | 1923-19             |
| Spain                | spai069 | Port de Cabus               | 42.32 | -1.25  | 2450 | Pinus sylvestris L.<br>Pinus uncinata<br>Mill.ex Mirb. | 77<br>1901-20<br>05 |
| Sweden               | swed011 | Gallejour<br>Glommerstark   | 65.17 | 19.47  | 480  | Picea abies (L.) H.<br>Karst.                          | 1901-19<br>78       |
| Sweden               | swed013 | Duvberg                     | 62.07 | 14.33  | 550  | Picea abies (L.) H.<br>Karst.                          | 1901-19<br>78       |
| Sweden               | swed017 | Arjeplog                    | 66.07 | 17.98  | 600  | Picea abies (L.) H.<br>Karst.                          | 1901-19<br>78       |
| Sweden               | swed330 | Kiruna                      | 67.54 | 20.06  | 430  |                                                        | 1901-20             |
| Switzerlan<br>d      | swit107 | Arosa GR Rot Tritt<br>North | 46.8  | 9.68   | 1940 | Pinus sylvestris L.<br>Picea abies (L.) H.<br>Karst.   | 06<br>1901-19<br>75 |
| Switzerlan<br>d      | swit108 | Arosa GR Arlenwald<br>South | 46.8  | 9.68   | 2000 | Picea abies (L.) H.<br>Karst.                          | 1901-19<br>75       |
| Switzerlan<br>d      | swit119 | Bannwald North              | 46.33 | 7.63   | 1240 |                                                        | 1901-19             |
| Switzerlan<br>d      | swit165 | Balmberg SO Feucht          | 47.25 | 7.53   | 1180 | Abies alba Mill.<br>Picea abies (L.)<br>H. Karst.      | 80<br>1901-19<br>82 |
| Switzerlan           | swit170 | Crete de la Neige           | 46.16 | 5.56   | 1700 | Pinus mughus                                           | 1901-19             |

|            |         |                |      |      |      |                     |         |
|------------|---------|----------------|------|------|------|---------------------|---------|
| d          |         |                |      |      |      | Scop.               | 87      |
| Switzerlan | swit172 | Beatenberg, BE | 46.7 | 7.77 | 1560 |                     | 1901-19 |
| d          |         |                |      |      |      | Pinus sylvestris L. | 88      |
